# Supplementary material for: Hepatic Gene Expression Profiling in Nrf2 Knockout Mice after Long-Term High-Fat Diet-Induced Obesity
Source: Hindawi journal article supplement (doi:10.1155/2013/340731), 2013-01-01
Supplement: f1 [file 340731.f1.pdf]

# **SUPPLEMENTARY FIGURES**

FIG.S1

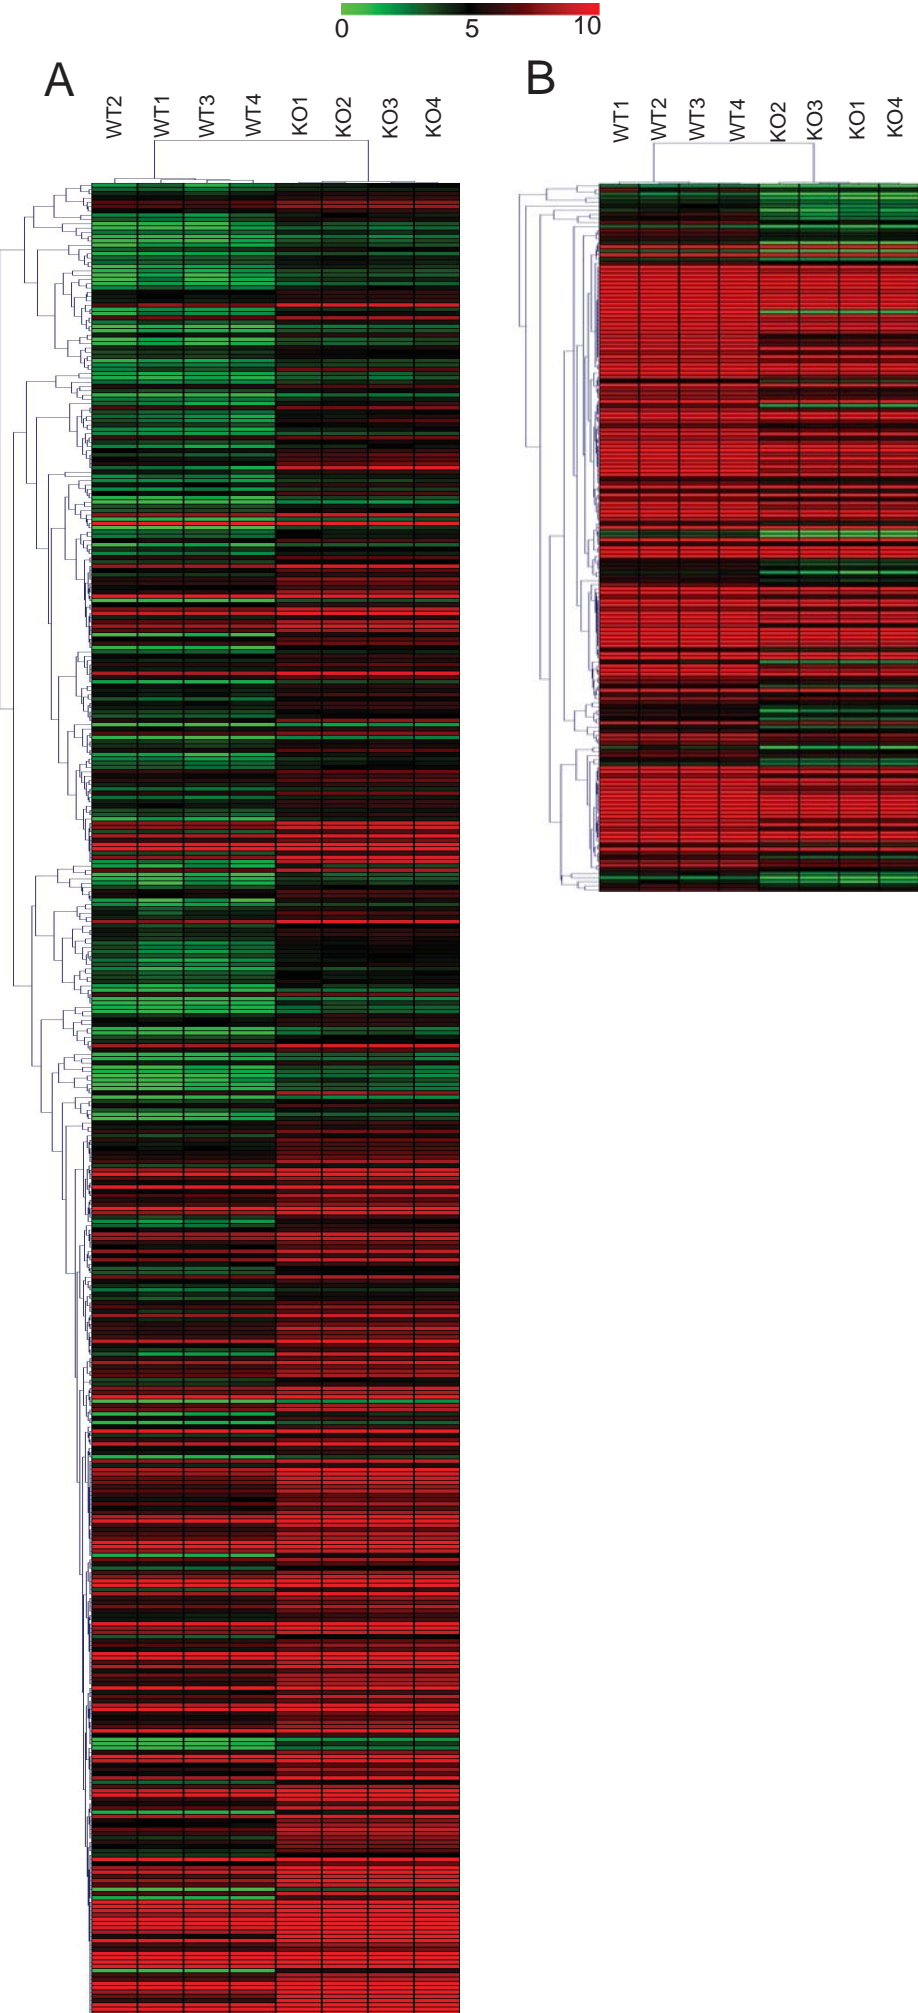

FIG.S2

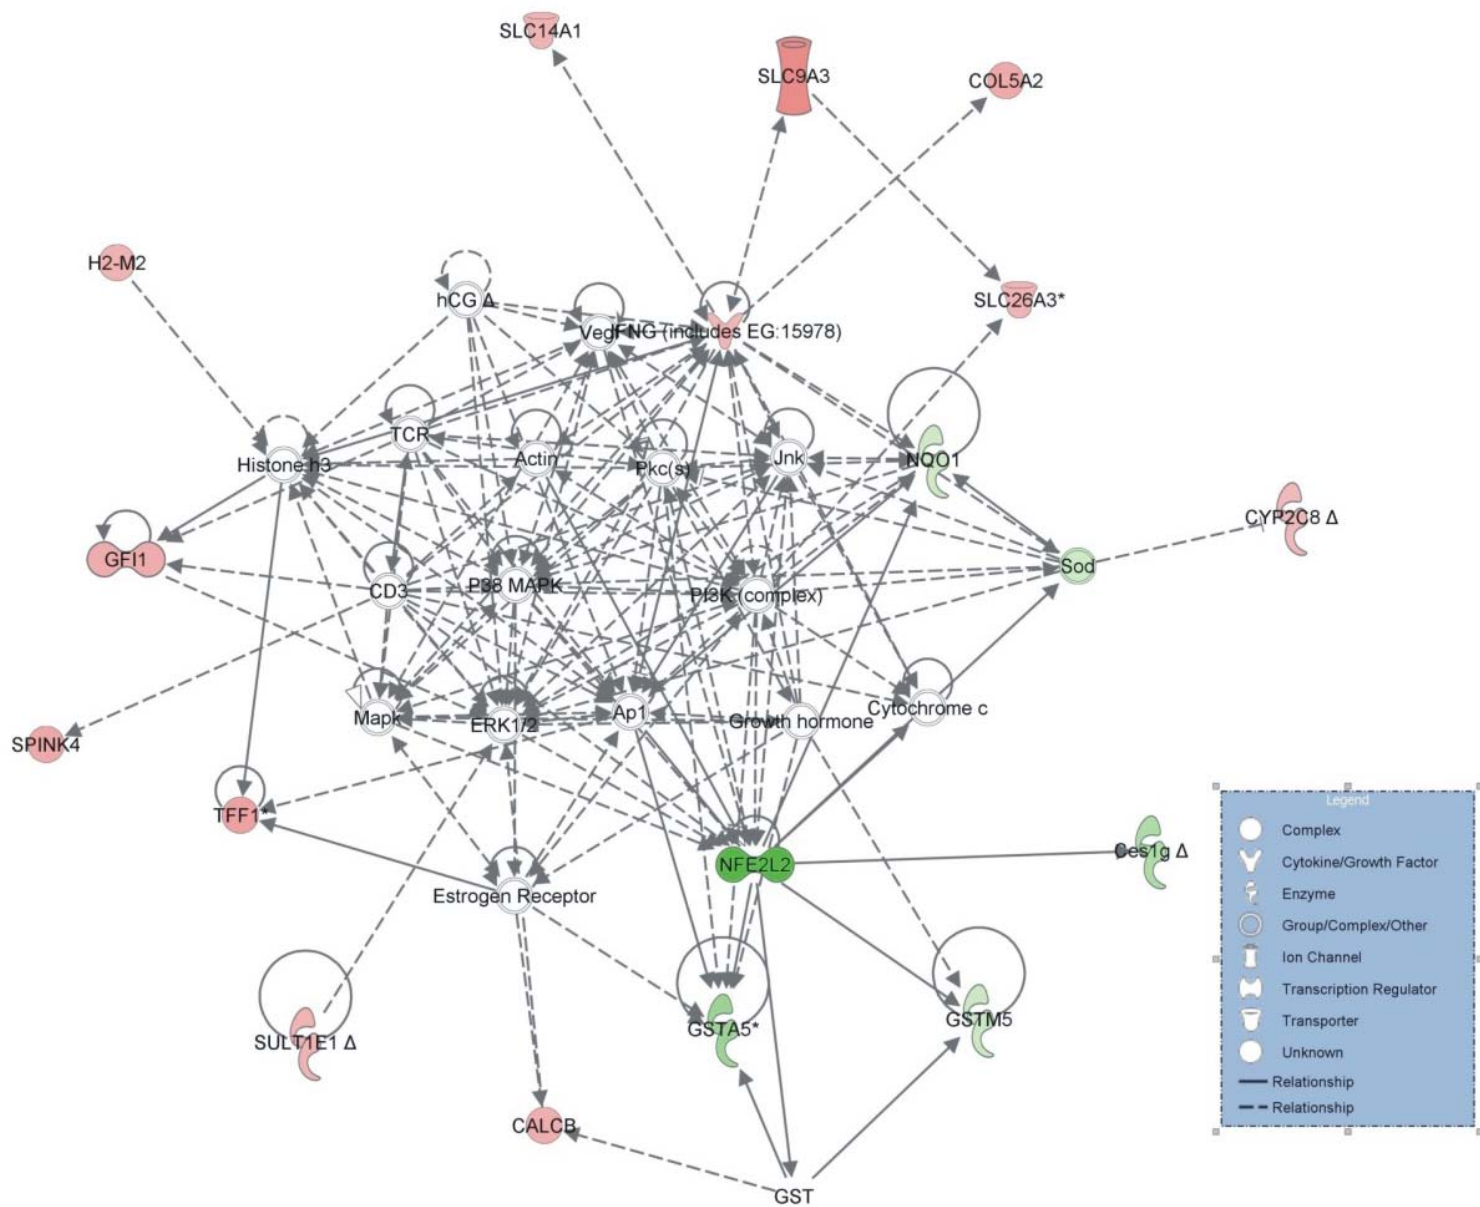

# **SUPPLEMENTARY TABLES**

**Table S1. Primer sequences used in quantitative RT-PCR.**

| <b>Gene</b>         | <b>Forward Primer</b>   | <b>Reverse Primer</b>   | <b>PrimerBank ID</b> |
|---------------------|-------------------------|-------------------------|----------------------|
| <i>Cyp7a1</i>       | GCTGTGGTAGTGAGCTGTTG    | AGGAGGTTTCACCTACTTTCCTT | 31542444b1           |
| <i>Fabp5</i>        | AAAGAGCTAGGAGTAGGACTGG  | TGTTGCCATCACACGTAATGA   | 118130073b1          |
| <i>Me1</i>          | ACAAAGGGCACATTGCTTCAG   | TTACCACAATAGCCTTGACGAC  | 162139826b3          |
| <i>Lipocalin 13</i> | TCATAAAGCGCATGAATCTCCG  | ATCTCCGATCTCTGGCACAAA   | 23956341b2           |
| <i>Aquaporin 8</i>  | CATCGGATGTCTATCGGTCATTG | AGGAGCCCAGTATTCGGACTA   | 157824035b2          |
| <i>Cyp2b10</i>      | TTGTTACTCTTAGCCAGGGGAC  | GGAAGTTGCCACGGGACTTT    | 118129803b1          |
| <i>Car</i>          | CCCTGACAGACCCGGAGTTA    | GCCGAGACTGTTGTTCCATAAT  | 6754888a1            |
| <i>Cbr3</i>         | CGGGCATCGCCTTTAGAATG    | GCTTGAATGTCTGAAGGGTGTT  | 226823287b2          |
| <i>Nqo1</i>         | GGCATCCTGCGTTTCTGTG     | GGTTTCCAGACGTTTCTTCCAT  | 6679080A3            |

*Cyp7a1* (cytochrome P450, family 7, subfamily A, polypeptide 1), *Fabp5* (fatty acid binding protein 5), *Me1* (malic enzyme 1), *Cyp2b10* (cytochrome P450, family 2, subfamily B, polypeptide 10), *Car* (constitutive androstane receptor), *Cbr3* (carbonyl reductase 3), *Nqo1* (NAD(P)H dehydrogenase, quinone 1).

Table S2. 428 genes that were over-expressed in the liver of the Nrf2 knock-out mice compared to the wild-type mice after 180 days on high-fat diet.

| Probe ID      | Primary Accession  | Gene Symbol | Gene Name                                                       | fold change |
|---------------|--------------------|-------------|-----------------------------------------------------------------|-------------|
| A_55_P2144686 | NM_007769          | Dmbt1       | deleted in malignant brain tumors 1                             | 138.3       |
| A_55_P1982499 | NM_177350          | Gldn        | gliomedin                                                       | 124.6       |
| A_51_P493987  | NM_021509          | Moxd1       | "monooxygenase, DBH-like 1"                                     | 86.3        |
| A_51_P329811  | NM_009042          | Reg1        | regenerating islet-derived 1                                    | 74.95       |
| A_51_P456208  | NM_011575          | Tff3        | "trefoil factor 3, intestinal"                                  | 84.32       |
| A_51_P450406  | AK132919           | Muc3        | "mucin 3, intestinal"                                           | 29.47       |
| A_52_P250400  | NM_178685          | Pcdh20      | protocadherin 20                                                | 19.82       |
| A_51_P434758  | NM_001033170       | Fam83e      | "family with sequence similarity 83, member E"                  | 19.48       |
| A_55_P2362635 | AK033564           | Slc9a3      | "solute carrier family 9 (sodium/hydrogen exchanger), member 3" | 15.85       |
| A_55_P2075253 | XM_001475531       | Gm3054      | predicted gene 3054                                             | 17.15       |
| A_55_P2047163 | NM_001105252       | Tmc5        | transmembrane channel-like gene family 5                        | 12.34       |
| A_52_P566840  | NM_133776          | Gpr110      | G protein-coupled receptor 110                                  | 13.8        |
| A_55_P2025687 | NM_080457          | Muc4        | mucin 4                                                         | 9.471       |
| A_52_P429450  | NM_008694          | Ngp         | neutrophilic granule protein                                    | 9.493       |
| A_55_P2048855 | NM_001164787       | Sprr2a2     | small proline-rich protein 2A2                                  | 13.15       |
| A_51_P285736  | NM_008798          | Pdcd1       | programmed cell death 1                                         | 9.304       |
| A_55_P2089076 | NM_001099314       | Msmg        | "microseminoprotein, prostate associated"                       | 10.25       |
| A_55_P2078281 | AY324401           | NA          | NA                                                              | 9.404       |
| A_55_P2042331 | ENSMUST00000122399 | NA          | NA                                                              | 8.83        |
| A_55_P2112005 | NM_009362          | Tff1        | trefoil factor 1                                                | 6.234       |
| A_55_P2137049 | NM_001004174       | AA467197    | expressed sequence AA467197                                     | 9.65        |
| A_52_P154101  | NM_001033954       | Calca       | "calcitonin/calcitonin-related polypeptide, alpha"              | 6.316       |
| A_51_P464703  | NM_021443          | Ccl8        | chemokine (C-C motif) ligand 8                                  | 7.859       |
| A_55_P2083014 | U63547             | NA          | NA                                                              | 8.295       |
| A_55_P1956147 | NM_008081          | B4galnt2    | "beta-1,4-N-acetyl-galactosaminyl transferase 2"                | 7.044       |
| A_55_P2162695 | X03802             | NA          | NA                                                              | 5.262       |
| A_52_P650453  | NM_011463          | Spink4      | "serine peptidase inhibitor, Kazal type 4"                      | 7.415       |
| A_55_P2083963 | NM_001145644       | Phgr1       | proline/histidine/glycine-rich 1                                | 7.38        |
| A_51_P419226  | NM_025393          | S100a14     | S100 calcium binding protein A14                                | 8.124       |
| A_55_P2186942 | ENSMUST00000103330 | NA          | NA                                                              | 7.192       |
| A_55_P2145389 | NM_001172160       | Flrt3       | fibronectin leucine rich transmembrane protein 3                | 7.404       |
| A_55_P1977008 | NM_010278          | Gfi1        | growth factor independent 1                                     | 6.642       |
| A_55_P2025586 | ENSMUST00000103483 | NA          | NA                                                              | 6.491       |
| A_55_P2220748 | NM_008586          | Mep1b       | mep1b                                                           | 5.911       |
| A_52_P31381   | NM_021353          | Slc26a3     | "solute carrier family 26, member 3"                            | 5.525       |

Table S2. (continued)

|               |                    |              |                                                                                   |       |
|---------------|--------------------|--------------|-----------------------------------------------------------------------------------|-------|
| A_55_P2157384 | NM_001111293       | Xlr5b        | X-linked lymphocyte-regulated 5B                                                  | 6.206 |
| A_55_P2104894 | NM_007737          | Col5a2       | "collagen, type V, alpha 2"                                                       | 6.913 |
| A_52_P307904  | NM_172825          | Gpr128       | G protein-coupled receptor 128                                                    | 5.256 |
| A_55_P2103948 | ENSMUST00000103361 | NA           | NA                                                                                | 7.246 |
| A_55_P2161794 | NM_028191          | Cyp2c65      | "cytochrome P450, family 2, subfamily c, polypeptide 65"                          | 4.89  |
| A_52_P279425  | NM_032465          | Cd96         | CD96 antigen                                                                      | 5.815 |
| A_55_P2135064 | NM_008204          | H2-M2        | "histocompatibility 2, M region locus 2"                                          | 5.596 |
| A_52_P447284  | NM_172469          | Clic6        | chloride intracellular channel 6                                                  | 7.266 |
| A_51_P312336  | NM_028122          | Slc14a1      | "solute carrier family 14 (urea transporter), member 1"                           | 5.615 |
| A_55_P1959421 | ENSMUST00000103379 | NA           | NA                                                                                | 6.033 |
| A_51_P493649  | NM_023135          | Sult1e1      | "sulfotransferase family 1E, member 1"                                            | 5.486 |
| A_55_P1969087 | ENSMUST00000053475 | NA           | NA                                                                                | 3.869 |
| A_55_P2110925 | NM_001172160       | Flrt3        | fibronectin leucine rich transmembrane protein 3                                  | 5.459 |
| A_52_P15388   | NM_008522          | Ltf          | lactotransferrin                                                                  | 5.331 |
| A_55_P2073024 | NM_001034859       | Gm4841       | predicted gene 4841                                                               | 5.58  |
| A_55_P1995537 | NM_010824          | Mpo          | myeloperoxidase                                                                   | 5.502 |
| A_55_P1958146 | NM_011364          | Sh2d1a       | SH2 domain protein 1A                                                             | 5.991 |
| A_55_P2092219 | NM_027997          | Serpina9     | "serine (or cysteine) peptidase inhibitor, clade A (alpha-1 antiproteinase, antil | 5.38  |
| A_55_P1954231 | NM_172492          | Lrtm2        | leucine-rich repeats and transmembrane domains 2                                  | 5.684 |
| A_55_P2115981 | NM_031493          | Xlr5c        | X-linked lymphocyte-regulated 5C                                                  | 5.546 |
| A_55_P2058028 | ENSMUST00000103351 | NA           | NA                                                                                | 5.472 |
| A_55_P2034655 | AK007918           | NA           | NA                                                                                | 5.243 |
| A_52_P312102  | ENSMUST00000090180 | Sema3g       | "sema domain, immunoglobulin domain (Ig), short basic domain, secreted, (s        | 5.709 |
| A_66_P114826  | ENSMUST00000103336 | NA           | NA                                                                                | 4.996 |
| A_51_P509679  | BC004786           | Igh-VJ558    | immunoglobulin heavy chain (J558 family)                                          | 5.132 |
| A_52_P480044  | XM_001471580       | BC023105     | cDNA sequence BC023105                                                            | 4.9   |
| A_51_P426096  | NM_010810          | Mmp7         | matrix metalloproteinase 7                                                        | 4.844 |
| A_51_P356642  | NM_008471          | Krt19        | keratin 19                                                                        | 4.925 |
| A_52_P200125  | M34969             | NA           | NA                                                                                | 4.41  |
| A_55_P2153762 | XM_916728          | LOC640020    | similar to Probable G-protein coupled receptor 110 precursor (G-protein coup      | 4.891 |
| A_55_P1971872 | XM_001477072       | LOC100046877 | similar to developmentally regulated RNA-binding protein 1                        | 5.259 |
| A_55_P2111322 | ENSMUST00000103741 | NA           | NA                                                                                | 4.878 |
| A_55_P1956598 | BC019489           | NA           | NA                                                                                | 4.816 |
| A_55_P2144556 | NM_001172160       | Flrt3        | fibronectin leucine rich transmembrane protein 3                                  | 4.795 |
| A_55_P1984362 | M11860             | NA           | NA                                                                                | 4.344 |
| A_55_P2111980 | NM_008295          | Hsd3b5       | "hydroxy-delta-5-steroid dehydrogenase, 3 beta- and steroid delta-isomerase       | 4.697 |

Table S2. (continued)

|               |                    |               |                                                                  |       |
|---------------|--------------------|---------------|------------------------------------------------------------------|-------|
| A_51_P115601  | ENSMUST00000103364 | NA            | NA                                                               | 5.418 |
| A_55_P1960148 | AK007826           | NA            | NA                                                               | 4.613 |
| A_55_P2063283 | AK135975           | Ighg          | Immunoglobulin heavy chain (gamma polypeptide)                   | 4.657 |
| A_55_P2066173 | AK041235           | NA            | NA                                                               | 4.823 |
| A_55_P2158102 | NM_009921          | Camp          | cathelicidin antimicrobial peptide                               | 4.816 |
| A_55_P2164977 | XM_001473158       | Gm2330        | predicted gene 2330                                              | 5.007 |
| A_55_P2062246 | NM_001145164       | Tgtp2         | T-cell specific GTPase 2                                         | 4.492 |
| A_55_P2016114 | NM_010177          | Fasl          | "Fas ligand (TNF superfamily, member 6)"                         | 4.924 |
| A_55_P2047589 | ENSMUST00000103328 | NA            | NA                                                               | 4.407 |
| A_55_P2020148 | NM_001001792       | Zfp239        | zinc finger protein 239                                          | 4.601 |
| A_55_P2133907 | ENSMUST00000103520 | NA            | NA                                                               | 4.939 |
| A_52_P638459  | NM_013653          | Ccl5          | chemokine (C-C motif) ligand 5                                   | 4.395 |
| A_52_P1190151 | ENSMUST00000103328 | NA            | NA                                                               | 5.177 |
| A_55_P2177243 | NM_145920          | Evc2          | Ellis van Creveld syndrome 2 homolog (human)                     | 4.075 |
| A_55_P2005984 | NM_138685          | Wfdc15b       | WAP four-disulfide core domain 15B                               | 4.446 |
| A_51_P492047  | NM_020622          | Fam3b         | "family with sequence similarity 3, member B"                    | 3.911 |
| A_55_P1987406 | ENSMUST00000103746 | NA            | NA                                                               | 4.538 |
| A_51_P406253  | NM_008100          | Gcg           | glucagon                                                         | 3.934 |
| A_51_P212068  | NM_029638          | Abp1          | "amiloride binding protein 1 (amine oxidase, copper-containing)" | 4.229 |
| A_51_P270904  | NM_172641          | 9930023K05Rik | RIKEN cDNA 9930023K05 gene                                       | 4.611 |
| A_51_P499195  | NM_024253          | Nkg7          | natural killer cell group 7 sequence                             | 4.221 |
| A_51_P259029  | NM_025869          | Dusp26        | dual specificity phosphatase 26 (putative)                       | 4.483 |
| A_55_P1961127 | NR_001592          | H19           | H19 fetal liver mRNA                                             | 4.133 |
| A_66_P113466  | ENSMUST00000103334 | NA            | NA                                                               | 4.083 |
| A_55_P2316041 | BC050972           | BC050972      | cDNA sequence BC050972                                           | 3.799 |
| A_55_P2072771 | NM_009850          | Cd3g          | "CD3 antigen, gamma polypeptide"                                 | 4.107 |
| A_55_P2150717 | NM_010136          | Eomes         | eomesodermin homolog ( <i>Xenopus laevis</i> )                   | 4.297 |
| A_55_P2214124 | BC019425           | Igh-VJ558     | immunoglobulin heavy chain (J558 family)                         | 3.963 |
| A_55_P2026238 | NA                 | NA            | NA                                                               | 4.616 |
| A_55_P2165199 | NM_030712          | Cxcr6         | chemokine (C-X-C motif) receptor 6                               | 4.087 |
| A_55_P2011341 | XM_001474162       | LOC100045268  | similar to precursor (AA -28 to 232)                             | 3.957 |
| A_55_P1987151 | NM_011860          | Nlrp5         | "NLR family, pyrin domain containing 5"                          | 4.093 |
| A_55_P2039699 | NM_009921          | Camp          | cathelicidin antimicrobial peptide                               | 4.248 |
| A_52_P112591  | U07662             | NA            | NA                                                               | 4.779 |
| A_55_P1962209 | NM_030712          | Cxcr6         | chemokine (C-X-C motif) receptor 6                               | 3.938 |
| A_66_P140474  | ENSMUST00000103348 | LOC100047316  | similar to anti-MOG Z12 variable light chain                     | 3.931 |



Table S2. (continued)

|               |                    |               |                                                                      |       |
|---------------|--------------------|---------------|----------------------------------------------------------------------|-------|
| A_52_P484956  | NM_010923          | Nnat          | neuronatin                                                           | 3.895 |
| A_52_P374897  | NM_009705          | Arg2          | arginase type II                                                     | 4.273 |
| A_52_P52849   | NM_018867          | Cpxm2         | carboxypeptidase X 2 (M14 family)                                    | 3.827 |
| A_51_P367866  | NM_007913          | Egr1          | early growth response 1                                              | 4.048 |
| A_55_P2045136 | AK153212           | I830127L07Rik | RIKEN cDNA I830127L07 gene                                           | 3.533 |
| A_55_P2020428 | NM_146232          | BC014805      | cDNA sequence BC014805                                               | 3.745 |
| A_55_P2161347 | NM_001033041       | Acmsd         | amino carboxymuconate semialdehyde decarboxylase                     | 3.861 |
| A_51_P507290  | NM_009769          | Klf5          | Kruppel-like factor 5                                                | 3.937 |
| A_55_P2249556 | AK042310           | A630081D01Rik | RIKEN cDNA A630081D01 gene                                           | 3.757 |
| A_51_P150710  | NM_152839          | Igj           | immunoglobulin joining chain                                         | 3.793 |
| A_55_P2058023 | ENSMUST00000103356 | NA            | NA                                                                   | 3.999 |
| A_52_P374653  | ENSMUST00000103397 | NA            | NA                                                                   | 3.851 |
| A_55_P2206605 | AK030886           | 5830444B04Rik | RIKEN cDNA 5830444B04 gene                                           | 3.97  |
| A_51_P448147  | NM_146167          | Gimap7        | "GTPase, IMAP family member 7"                                       | 3.831 |
| A_51_P458451  | NM_009605          | Adipoq        | "adiponectin, C1Q and collagen domain containing"                    | 3.589 |
| A_55_P2094060 | NM_010370          | Gzma          | granzyme A                                                           | 3.698 |
| A_55_P2004761 | NM_001033978       | H2-Eb2        | "histocompatibility 2, class II antigen E beta2"                     | 3.524 |
| A_52_P112190  | ENSMUST00000103377 | LOC100047053  | similar to monoclonal antibody kappa light chain                     | 3.732 |
| A_55_P2186978 | ENSMUST00000103352 | NA            | NA                                                                   | 3.86  |
| A_55_P2092750 | NM_139305          | Car9          | carbonic anhydrase 9                                                 | 3.666 |
| A_66_P102346  | ENSMUST00000103321 | NA            | NA                                                                   | 3.472 |
| A_55_P2121701 | AK140370           | E530001K10Rik | RIKEN cDNA E530001K10 gene                                           | 3.634 |
| A_51_P485756  | NM_024435          | Nts           | neurotensin                                                          | 3.598 |
| A_55_P2046653 | ENSMUST00000103460 | LOC641221     | similar to Ig heavy chain V region PJ14 precursor                    | 3.544 |
| A_51_P269404  | NM_008030          | Fmo3          | flavin containing monooxygenase 3                                    | 3.614 |
| A_55_P2013840 | NM_212483          | Krt42         | keratin 42                                                           | 3.986 |
| A_52_P502849  | ENSMUST00000103401 | NA            | NA                                                                   | 3.661 |
| A_66_P139675  | M11858             | NA            | NA                                                                   | 3.506 |
| A_51_P137419  | NM_009977          | Cst7          | cystatin F (leukocystatin)                                           | 3.568 |
| A_55_P2002744 | ENSMUST00000103528 | NA            | NA                                                                   | 3.626 |
| A_55_P2058040 | ENSMUST00000103345 | NA            | NA                                                                   | 3.828 |
| A_51_P478172  | AY324401           | NA            | NA                                                                   | 3.598 |
| A_51_P136781  | NM_018874          | Pnliprp1      | pancreatic lipase related protein 1                                  | 3.558 |
| A_51_P122649  | NM_027299          | Degs2         | "degenerative spermatocyte homolog 2 (Drosophila), lipid desaturase" | 3.521 |
| A_52_P443334  | NM_001081110       | Cd8a          | "CD8 antigen, alpha chain"                                           | 3.652 |
| A_55_P1977038 | NM_008599          | Cxcl9         | chemokine (C-X-C motif) ligand 9                                     | 3.704 |

Table S2. (continued)

|               |                    |               |                                                                                 |       |
|---------------|--------------------|---------------|---------------------------------------------------------------------------------|-------|
| A_66_P105596  | ENSMUST00000103396 | LOC676193     | similar to Ig kappa chain V-III region PC 6684                                  | 3.743 |
| A_55_P2094104 | ENSMUST00000103380 | LOC100047070  | "similar to [Human Ig rearranged gamma chain mRNA, V-J-C region and corr        | 3.785 |
| A_66_P109692  | ENSMUST00000103332 | NA            | NA                                                                              | 3.501 |
| A_55_P2183369 | ENSMUST00000103401 | NA            | NA                                                                              | 3.862 |
| A_66_P106760  | NM_153397          | Adam32        | a disintegrin and metallopeptidase domain 32                                    | 3.513 |
| A_51_P174696  | NM_009814          | Casq2         | calsequestrin 2                                                                 | 3.227 |
| A_65_P07626   | ENSMUST00000103403 | NA            | NA                                                                              | 3.602 |
| A_51_P167292  | NM_009892          | Chi3l3        | chitinase 3-like 3                                                              | 3.435 |
| A_51_P363400  | NM_008920          | Prg2          | "proteoglycan 2, bone marrow"                                                   | 3.643 |
| A_55_P2003911 | ENSMUST00000103391 | NA            | NA                                                                              | 3.639 |
| A_55_P2065506 | ENSMUST00000103513 | LOC639930     | similar to Ig heavy chain V-I region HG3 precursor                              | 3.829 |
| A_51_P136294  | NM_021718          | Ms4a4b        | "membrane-spanning 4-domains, subfamily A, member 4B"                           | 3.566 |
| A_52_P614207  | ENSMUST00000103399 | LOC100047222  | similar to anti-glycoprotein-B of human Cytomegalovirus immunoglobulin VI c     | 3.4   |
| A_55_P2153517 | NM_027147          | Enho          | energy homeostasis associated                                                   | 3.429 |
| A_55_P2015753 | NM_027147          | Enho          | energy homeostasis associated                                                   | 3.519 |
| A_55_P2156653 | NM_001177781       | Gpr174        | G protein-coupled receptor 174                                                  | 4.176 |
| A_51_P285206  | NM_013487          | Cd3d          | "CD3 antigen, delta polypeptide"                                                | 3.419 |
| A_51_P461665  | NM_008599          | Cxcl9         | chemokine (C-X-C motif) ligand 9                                                | 3.383 |
| A_55_P2390776 | NR_027981          | 1810064F22Rik | RIKEN cDNA 1810064F22 gene                                                      | 3.377 |
| A_55_P1978033 | ENSMUST00000103397 | NA            | NA                                                                              | 3.535 |
| A_51_P268697  | NM_148938          | Slc1a3        | "solute carrier family 1 (glial high affinity glutamate transporter), member 3" | 3.285 |
| A_55_P1996702 | NM_008174          | Grm8          | "glutamate receptor, metabotropic 8"                                            | 3.382 |
| A_55_P2065510 | ENSMUST00000103506 | NA            | NA                                                                              | 3.451 |
| A_55_P2416494 | AK020235           | 8430426J06Rik | RIKEN cDNA 8430426J06 gene                                                      | 3.479 |
| A_55_P1998471 | NM_009114          | S100a9        | S100 calcium binding protein A9 (calgranulin B)                                 | 3.359 |
| A_51_P395899  | ENSMUST00000103404 | LOC100047628  | "similar to Chain L, Structural Basis Of Antigen Mimicry In A Clinically Releva | 3.34  |
| A_55_P2140348 | BC103785           | Igh-VJ558     | immunoglobulin heavy chain (J558 family)                                        | 3.206 |
| A_51_P256827  | NM_013650          | S100a8        | S100 calcium binding protein A8 (calgranulin A)                                 | 3.404 |
| A_55_P1956083 | NM_175493          | Gpr68         | G protein-coupled receptor 68                                                   | 3.48  |
| A_55_P2026903 | NM_001146325       | Tigit         | T cell immunoreceptor with Ig and ITIM domains                                  | 3.075 |
| A_55_P2154982 | NM_009858          | Cd8b1         | "CD8 antigen, beta chain 1"                                                     | 3.199 |
| A_55_P1966608 | XM_917762          | LOC640701     | similar to Ig heavy chain V-I region V35 precursor                              | 3.623 |
| A_51_P478722  | NM_011579          | Tgtp1         | T-cell specific GTPase 1                                                        | 3.146 |
| A_55_P1970464 | ENSMUST00000103507 | NA            | NA                                                                              | 3.306 |
| A_55_P2060897 | ENSMUST00000103410 | NA            | NA                                                                              | 3.238 |
| A_51_P497741  | NM_029440          | 4930434E21Rik | RIKEN cDNA 4930434E21 gene                                                      | 3.236 |

Table S2. (continued)

|               |                    |               |                                                         |       |
|---------------|--------------------|---------------|---------------------------------------------------------|-------|
| A_52_P563375  | NM_025622          | Lgals2        | "lectin, galactose-binding, soluble 2"                  | 3.182 |
| A_52_P195135  | NM_133353          | Oosp1         | oocyte secreted protein 1                               | 3.063 |
| A_55_P2007601 | NM_009160          | Sftpd         | surfactant associated protein D                         | 3.31  |
| A_51_P493016  | NM_023821          | Cmya5         | cardiomyopathy associated 5                             | 2.749 |
| A_55_P2001262 | ENSMUST00000109711 | NA            | NA                                                      | 3.385 |
| A_51_P405638  | ENSMUST00000103473 | LOC100045791  | similar to monoclonal antibody heavy chain              | 3.049 |
| A_55_P2012592 | NM_134109          | Ildr1         | immunoglobulin-like domain containing receptor 1        | 2.786 |
| A_55_P1977451 | ENSMUST00000103341 | NA            | NA                                                      | 3.43  |
| A_55_P2138627 | ENSMUST00000103486 | LOC675759     | similar to Ig heavy chain V-III region J606             | 3.525 |
| A_66_P127563  | ENSMUST00000103360 | NA            | NA                                                      | 3.223 |
| A_66_P106497  | ENSMUST00000103378 | NA            | NA                                                      | 3.174 |
| A_52_P618728  | ENSMUST00000103362 | NA            | NA                                                      | 3.117 |
| A_55_P1984556 | NM_011331          | Ccl12         | chemokine (C-C motif) ligand 12                         | 3.116 |
| A_52_P578436  | ENSMUST00000103347 | NA            | NA                                                      | 3.222 |
| A_55_P1969901 | ENSMUST00000103547 | NA            | NA                                                      | 3.404 |
| A_51_P171772  | NM_021399          | Bcl11b        | B-cell leukemia/lymphoma 11B                            | 3.234 |
| A_55_P2005838 | NM_029835          | 5730590G19Rik | RIKEN cDNA 5730590G19 gene                              | 3.079 |
| A_55_P1964886 | NM_019915          | Art2b         | ADP-ribosyltransferase 2b                               | 3.033 |
| A_51_P513776  | ENSMUST00000103535 | LOC640979     | similar to Ig heavy chain V region 23 precursor         | 3.138 |
| A_51_P419656  | NM_020268          | Klk1b27       | kallikrein 1-related peptidase b27                      | 2.882 |
| A_51_P288295  | ENSMUST00000103496 | LOC677484     | similar to Ig heavy chain V region B1-8/186-2 precursor | 3.13  |
| A_55_P2059010 | NM_011254          | Rbp1          | "retinol binding protein 1, cellular"                   | 3.122 |
| A_55_P2135986 | NM_029499          | Ms4a4c        | "membrane-spanning 4-domains, subfamily A, member 4C"   | 3.105 |
| A_66_P109519  | NM_007914          | Ehf           | ets homologous factor                                   | 3.039 |
| A_55_P1983921 | NM_021352          | Crybb3        | "crystallin, beta B3"                                   | 3.122 |
| A_52_P320193  | NM_053165          | Clec2h        | "C-type lectin domain family 2, member h"               | 3.005 |
| A_55_P2107374 | NM_025777          | Duoxa2        | dual oxidase maturation factor 2                        | 3.051 |
| A_55_P2001281 | ENSMUST00000103523 | NA            | NA                                                      | 3.377 |
| A_55_P2096797 | NM_001040696       | Nlrp1b        | "NLR family, pyrin domain containing 1B"                | 3.416 |
| A_55_P1988975 | BC028433           | Ms4a4b        | "membrane-spanning 4-domains, subfamily A, member 4B"   | 3.002 |
| A_66_P108380  | NM_172447          | A330021E22Rik | RIKEN cDNA A330021E22 gene                              | 3.04  |
| A_55_P1989225 | NM_001145164       | Tgtp2         | T-cell specific GTPase 2                                | 2.907 |
| A_55_P2063880 | ENSMUST00000110689 | NA            | NA                                                      | 2.947 |
| A_55_P2019989 | XM_001479535       | Gm4249        | predicted gene 4249                                     | 2.863 |
| A_55_P2011950 | ENSMUST00000103552 | LOC435333     | similar to monoclonal antibody heavy chain              | 2.977 |
| A_51_P221510  | NM_029784          | Fam81a        | "family with sequence similarity 81, member A"          | 2.845 |

Table S2. (continued)

|               |                    |               |                                                                            |       |
|---------------|--------------------|---------------|----------------------------------------------------------------------------|-------|
| A_51_P203955  | NM_010260          | Gbp2          | guanylate binding protein 2                                                | 2.904 |
| A_55_P2001269 | ENSMUST00000103522 | NA            | NA                                                                         | 2.896 |
| A_52_P184629  | M25913             | NA            | NA                                                                         | 2.523 |
| A_55_P1996973 | NM_029000          | Gvin1         | "GTPase, very large interferon inducible 1"                                | 2.895 |
| A_55_P2105454 | ENSMUST00000103458 | NA            | NA                                                                         | 3.155 |
| A_55_P2021275 | NM_029122          | lqca          | IQ motif containing with AAA domain                                        | 2.739 |
| A_51_P487073  | NM_138684          | Wfdc12        | WAP four-disulfide core domain 12                                          | 2.8   |
| A_55_P2030299 | ENSMUST00000103469 | LOC544904     | similar to Ig heavy chain V region 186-1 precursor                         | 2.869 |
| A_55_P2100194 | BC100303           | A530040E14Rik | RIKEN cDNA A530040E14 gene                                                 | 2.912 |
| A_51_P140237  | NM_010212          | Fhl2          | four and a half LIM domains 2                                              | 2.996 |
| A_52_P142191  | NM_177583          | Aph1b         | anterior pharynx defective 1b homolog (C. elegans)                         | 2.89  |
| A_55_P2124586 | NM_001081642       | Xlr4a         | X-linked lymphocyte-regulated 4A                                           | 2.981 |
| A_51_P485421  | ENSMUST00000103426 | NA            | NA                                                                         | 2.969 |
| A_55_P2039230 | XM_001477580       | LOC100047175  | hypothetical protein LOC100047175                                          | 2.702 |
| A_52_P213483  | AK007918           | NA            | NA                                                                         | 3.154 |
| A_52_P501875  | NM_001077684       | 4930578N16Rik | RIKEN cDNA 4930578N16 gene                                                 | 3.264 |
| A_51_P455997  | NR_027652          | Meg3          | maternally expressed 3                                                     | 2.581 |
| A_52_P150547  | NM_009857          | Cd8a          | "CD8 antigen, alpha chain"                                                 | 2.852 |
| A_51_P509573  | NM_013652          | Ccl4          | chemokine (C-C motif) ligand 4                                             | 2.801 |
| A_55_P2087429 | ENSMUST00000103393 | LOC100047162  | similar to immunoglobulin kappa-chain                                      | 2.789 |
| A_55_P1988844 | NM_016970          | Klrg1         | "killer cell lectin-like receptor subfamily G, member 1"                   | 2.678 |
| A_55_P2068673 | NM_025285          | Stmn2         | stathmin-like 2                                                            | 2.896 |
| A_55_P2186972 | ENSMUST00000103342 | NA            | NA                                                                         | 3.163 |
| A_55_P2117081 | M54990             | NA            | NA                                                                         | 2.656 |
| A_51_P389636  | NM_008433          | Kcnn4         | "potassium intermediate/small conductance calcium-activated channel, subfa | 2.654 |
| A_55_P1976450 | XM_001004859       | NA            | NA                                                                         | 2.963 |
| A_55_P2103837 | NM_008620          | Gbp4          | guanylate binding protein 4                                                | 2.596 |
| A_51_P116601  | NM_172447          | A330021E22Rik | RIKEN cDNA A330021E22 gene                                                 | 2.725 |
| A_55_P2042076 | NM_145592          | Dkk4          | dickkopf homolog 4 (Xenopus laevis)                                        | 2.672 |
| A_51_P503896  | BC006727           | Pycr1         | pyrroline-5-carboxylate reductase 1                                        | 2.539 |
| A_55_P2145711 | NM_172913          | Tox3          | TOX high mobility group box family member 3                                | 2.74  |
| A_52_P343627  | NM_022020          | Rbp7          | "retinol binding protein 7, cellular"                                      | 2.596 |
| A_55_P2108077 | M13677             | NA            | NA                                                                         | 2.484 |
| A_55_P2001267 | XM_001472404       | NA            | NA                                                                         | 4.073 |
| A_55_P1999902 | AK167816           | Pip5k1a       | "phosphatidylinositol-4-phosphate 5-kinase, type 1 alpha"                  | 2.742 |
| A_55_P2169356 | AK156879           | Gm1966        | predicted gene 1966                                                        | 2.696 |

Table S2. (continued)

|               |                    |               |                                                                              |       |
|---------------|--------------------|---------------|------------------------------------------------------------------------------|-------|
| A_55_P2179599 | NM_029509          | Gbp8          | guanylate-binding protein 8                                                  | 2.639 |
| A_51_P426270  | NM_008597          | Mgp           | matrix Gla protein                                                           | 2.68  |
| A_55_P2115906 | NM_181680          | Dsg1c         | desmoglein 1 gamma                                                           | 2.549 |
| A_55_P1999715 | M97158             | NA            | NA                                                                           | 2.635 |
| A_51_P473498  | NM_173398          | Gpr171        | G protein-coupled receptor 171                                               | 2.569 |
| A_55_P2171196 | XM_001476596       | Gm3411        | predicted gene 3411                                                          | 2.565 |
| A_52_P295104  | NM_183259          | 2210020M01Rik | RIKEN cDNA 2210020M01 gene                                                   | 2.638 |
| A_51_P435922  | NM_029338          | Rsph9         | radial spoke head 9 homolog (Chlamydomonas)                                  | 2.62  |
| A_51_P350817  | NM_009922          | Cnn1          | calponin 1                                                                   | 2.601 |
| A_55_P2176753 | XM_917662          | LOC640614     | similar to Ig heavy chain V region 93G7 precursor                            | 2.555 |
| A_51_P517001  | NM_172491          | D130040H23Rik | RIKEN cDNA D130040H23 gene                                                   | 1.91  |
| A_55_P1960202 | NM_001081249       | Vcan          | versican                                                                     | 2.371 |
| A_51_P398766  | NM_010259          | Gbp1          | guanylate binding protein 1                                                  | 2.474 |
| A_55_P2130497 | ENSMUST00000103538 | NA            | NA                                                                           | 2.604 |
| A_55_P2121294 | NA                 | NA            | NA                                                                           | 2.267 |
| A_52_P488437  | NM_013738          | Plek2         | pleckstrin 2                                                                 | 2.537 |
| A_55_P2146214 | NM_001035510       | Zcchc18       | "zinc finger, CCHC domain containing 18"                                     | 2.536 |
| A_51_P167263  | NM_007650          | Cd5           | CD5 antigen                                                                  | 2.573 |
| A_51_P322972  | NM_145419          | Hkdc1         | hexokinase domain containing 1                                               | 2.513 |
| A_51_P104768  | ENSMUST00000103498 | Gm16697       | "predicted gene, 16697"                                                      | 2.695 |
| A_66_P124179  | NM_175406          | Atp6v0d2      | "ATPase, H <sup>+</sup> transporting, lysosomal V0 subunit D2"               | 2.472 |
| A_55_P2059931 | NM_001163577       | Prom1         | prominin 1                                                                   | 2.535 |
| A_55_P1953387 | NM_010634          | Fabp5         | "fatty acid binding protein 5, epidermal"                                    | 2.506 |
| A_52_P431615  | XM_001000891       | Gm1966        | predicted gene 1966                                                          | 2.47  |
| A_55_P1961715 | NM_080637          | Nme5          | "non-metastatic cells 5, protein expressed in (nucleoside-diphosphate kinase | 2.485 |
| A_52_P535484  | NM_029000          | Gvin1         | "GTPase, very large interferon inducible 1"                                  | 2.496 |
| A_66_P106388  | NM_029499          | Ms4a4c        | "membrane-spanning 4-domains, subfamily A, member 4C"                        | 2.485 |
| A_55_P2187067 | ENSMUST00000103317 | NA            | NA                                                                           | 2.476 |
| A_52_P30641   | ENSMUST00000103337 | NA            | NA                                                                           | 2.796 |
| A_55_P1952768 | XM_001481046       | LOC100048720  | similar to guanylate nucleotide binding protein 1                            | 2.477 |
| A_52_P266132  | NM_008013          | Fgl2          | fibrinogen-like protein 2                                                    | 2.517 |
| A_55_P1958464 | NAP112102-1        | NA            | NA                                                                           | 2.458 |
| A_51_P301930  | NM_028977          | Lrrc17        | leucine rich repeat containing 17                                            | 2.527 |
| A_52_P259817  | NM_029692          | Upp2          | uridine phosphorylase 2                                                      | 2.515 |
| A_55_P2050439 | NM_144553          | Dlgap5        | "discs, large (Drosophila) homolog-associated protein 5"                     | 2.638 |
| A_55_P1979364 | ENSMUST00000103550 | NA            | NA                                                                           | 2.591 |

Table S2. (continued)

|               |                    |               |                                                                             |       |
|---------------|--------------------|---------------|-----------------------------------------------------------------------------|-------|
| A_55_P2011794 | XM_911832          | LOC636441     | similar to Ig heavy chain V region VH558 A1/A4 precursor                    | 2.62  |
| A_55_P2026547 | NM_199366          | Gal3st2       | galactose-3-O-sulfotransferase 2                                            | 2.501 |
| A_55_P2003915 | ENSMUST00000103386 | NA            | NA                                                                          | 2.395 |
| A_55_P2168823 | NAP111644-1        | NA            | NA                                                                          | 2.407 |
| A_51_P150120  | NM_174995          | Mgst2         | microsomal glutathione S-transferase 2                                      | 2.376 |
| A_55_P2097219 | NM_010259          | Gbp1          | guanylate binding protein 1                                                 | 2.512 |
| A_51_P461067  | AK041235           | NA            | NA                                                                          | 2.43  |
| A_52_P149577  | NM_016899          | Rab25         | "RAB25, member RAS oncogene family"                                         | 2.291 |
| A_55_P2046101 | NM_021365          | Xlr4b         | X-linked lymphocyte-regulated 4B                                            | 2.453 |
| A_55_P2115900 | NM_181682          | Dsg1b         | desmoglein 1 beta                                                           | 2.473 |
| A_51_P365516  | NM_009258          | Spink3        | "serine peptidase inhibitor, Kazal type 3"                                  | 2.439 |
| A_55_P2187030 | ENSMUST00000103537 | NA            | NA                                                                          | 2.486 |
| A_55_P1969665 | NM_001111336       | Hsd3b4        | "hydroxy-delta-5-steroid dehydrogenase, 3 beta- and steroid delta-isomerase | 2.062 |
| A_66_P133148  | NM_012054          | Aoah          | acyloxyacyl hydrolase                                                       | 2.398 |
| A_52_P615247  | AK087744           | A530040E14Rik | RIKEN cDNA A530040E14 gene                                                  | 2.415 |
| A_51_P231320  | NM_008611          | Mmp8          | matrix metalloproteinase 8                                                  | 2.371 |
| A_55_P2042813 | NM_001039647       | Gbp11         | guanylate binding protein 11                                                | 2.439 |
| A_51_P286496  | NM_008368          | Il2rb         | "interleukin 2 receptor, beta chain"                                        | 2.399 |
| A_55_P1998943 | NM_145211          | Oas1a         | 2'-5' oligoadenylate synthetase 1A                                          | 2.435 |
| A_55_P2101696 | NM_008141          | Gnat2         | "guanine nucleotide binding protein, alpha transducing 2"                   | 2.35  |
| A_55_P2180176 | NM_027209          | Ms4a6b        | "membrane-spanning 4-domains, subfamily A, member 6B"                       | 2.418 |
| A_55_P2124582 | NM_001081642       | Xlr4a         | X-linked lymphocyte-regulated 4A                                            | 2.433 |
| A_55_P2019690 | NM_001081349       | Slc43a1       | "solute carrier family 43, member 1"                                        | 2.379 |
| A_55_P2122841 | NAP114472-1        | NA            | NA                                                                          | 2.385 |
| A_52_P456750  | NM_177583          | Aph1b         | anterior pharynx defective 1b homolog (C. elegans)                          | 2.43  |
| A_55_P2052385 | NM_194336          | Mpa2l         | macrophage activation 2 like                                                | 2.369 |
| A_55_P1968723 | NM_009834          | Ccrn4l        | CCR4 carbon catabolite repression 4-like (S. cerevisiae)                    | 2.365 |
| A_52_P441974  | NM_145920          | Evc2          | Ellis van Creveld syndrome 2 homolog (human)                                | 2.36  |
| A_51_P177092  | NM_011487          | Stat4         | signal transducer and activator of transcription 4                          | 2.387 |
| A_55_P1983448 | NM_011311          | S100a4        | S100 calcium binding protein A4                                             | 2.351 |
| A_55_P2155504 | NM_010693          | Lck           | lymphocyte protein tyrosine kinase                                          | 2.353 |
| A_66_P119518  | NM_017379          | Tuba8         | "tubulin, alpha 8"                                                          | 2.431 |
| A_51_P438967  | NM_053110          | Gpnmb         | glycoprotein (transmembrane) nmb                                            | 2.447 |
| A_55_P2150976 | ENSMUST00000072582 | Fabp5l2       | fatty acid binding protein 5-like 2                                         | 2.344 |
| A_66_P121053  | NM_009160          | Sftpd         | surfactant associated protein D                                             | 2.304 |
| A_55_P2051159 | NM_029692          | Upp2          | uridine phosphorylase 2                                                     | 2.385 |

Table S2. (continued)

|               |                    |               |                                                               |       |
|---------------|--------------------|---------------|---------------------------------------------------------------|-------|
| A_51_P495242  | NM_010689          | Lat           | linker for activation of T cells                              | 2.569 |
| A_51_P283344  | NM_025956          | 1700011H14Rik | RIKEN cDNA 1700011H14 gene                                    | 2.359 |
| A_55_P2077901 | NM_013486          | Cd2           | CD2 antigen                                                   | 2.338 |
| A_51_P390937  | ENSMUST00000103320 | LOC675735     | similar to Ig kappa chain V-V region L6 precursor             | 2.335 |
| A_55_P2081432 | XR_002130          | Gm8953        | "2-cell-stage, variable group, member 3-like pseudogene"      | 2.285 |
| A_55_P2207255 | NM_016911          | Srpx          | sushi-repeat-containing protein                               | 2.328 |
| A_55_P2046877 | NM_008239          | Foxq1         | forkhead box Q1                                               | 2.305 |
| A_51_P112355  | NM_018738          | Igtp          | interferon gamma induced GTPase                               | 2.301 |
| A_51_P116651  | NM_019759          | Dpt           | dermatopontin                                                 | 2.301 |
| A_55_P2113498 | NM_010654          | Klrd1         | "killer cell lectin-like receptor, subfamily D, member 1"     | 2.291 |
| A_55_P2052016 | NM_030209          | Crispld2      | cysteine-rich secretory protein LCCL domain containing 2      | 2.358 |
| A_55_P2083879 | NM_020518          | Vsig2         | V-set and immunoglobulin domain containing 2                  | 2.322 |
| A_55_P1979491 | NM_007642          | Cd28          | CD28 antigen                                                  | 2.259 |
| A_55_P2004016 | NM_030209          | Crispld2      | cysteine-rich secretory protein LCCL domain containing 2      | 2.289 |
| A_55_P2051039 | NM_001099346       | Gm11937       | predicted gene 11937                                          | 2.371 |
| A_51_P510891  | NM_007423          | Afp           | alpha fetoprotein                                             | 2.279 |
| A_55_P2122618 | AK002412           | Asb11         | ankyrin repeat and SOCS box-containing 11                     | 2.32  |
| A_51_P126067  | NM_013486          | Cd2           | CD2 antigen                                                   | 2.307 |
| A_55_P2060243 | NM_145467          | Itgbl1        | "integrin, beta-like 1"                                       | 2.266 |
| A_55_P1977782 | NM_001081209       | Prdm14        | PR domain containing 14                                       | 1.958 |
| A_55_P2057936 | NM_001135115       | Gm12250       | predicted gene 12250                                          | 2.223 |
| A_51_P437240  | NM_007929          | Emp2          | epithelial membrane protein 2                                 | 2.277 |
| A_55_P2072035 | NM_009382          | Thy1          | "thymus cell antigen 1, theta"                                | 2.233 |
| A_55_P1978681 | NM_146010          | Tspan8        | tetraspanin 8                                                 | 2.253 |
| A_55_P1992849 | NM_013462          | Adrb3         | "adrenergic receptor, beta 3"                                 | 2.267 |
| A_55_P1989658 | NM_013797          | Slco1a1       | "solute carrier organic anion transporter family, member 1a1" | 2.235 |
| A_55_P2017710 | NM_033608          | Igsf9         | "immunoglobulin superfamily, member 9"                        | 2.384 |
| A_51_P246317  | NM_008630          | Mt2           | metallothionein 2                                             | 2.219 |
| A_55_P2472435 | NM_018734          | Gbp3          | guanylate binding protein 3                                   | 2.229 |
| A_55_P2035946 | NM_001002927       | Penk          | preproenkephalin                                              | 2.115 |
| A_55_P1961499 | NM_010741          | Ly6c1         | "lymphocyte antigen 6 complex, locus C1"                      | 2.209 |
| A_55_P2124498 | NM_019583          | Il17rb        | interleukin 17 receptor B                                     | 2.241 |
| A_55_P1982404 | NM_001177956       | Gpm6b         | glycoprotein m6b                                              | 2.196 |
| A_51_P255456  | NM_009994          | Cyp1b1        | "cytochrome P450, family 1, subfamily b, polypeptide 1"       | 2.209 |
| A_52_P327664  | NM_153564          | Gbp5          | guanylate binding protein 5                                   | 2.195 |
| A_55_P1953788 | NM_010583          | Itk           | IL2-inducible T-cell kinase                                   | 2.198 |

Table S2. (continued)

|               |                    |               |                                                                             |       |
|---------------|--------------------|---------------|-----------------------------------------------------------------------------|-------|
| A_51_P193146  | NM_028595          | Ms4a6c        | "membrane-spanning 4-domains, subfamily A, member 6C"                       | 2.189 |
| A_52_P84027   | NM_007824          | Cyp7a1        | "cytochrome P450, family 7, subfamily a, polypeptide 1"                     | 2.181 |
| A_52_P71686   | NM_175406          | Atp6v0d2      | "ATPase, H <sup>+</sup> transporting, lysosomal V0 subunit D2"              | 2.138 |
| A_55_P1955308 | NM_001002898       | Sirpb1a       | signal-regulatory protein beta 1A                                           | 2.175 |
| A_51_P137336  | NM_009864          | Cdh1          | cadherin 1                                                                  | 2.224 |
| A_51_P380309  | NM_001113204       | Ncam1         | neural cell adhesion molecule 1                                             | 2.123 |
| A_55_P2184013 | NM_175219          | C130026I21Rik | RIKEN cDNA C130026I21 gene                                                  | 2.189 |
| A_66_P103232  | ENSMUST00000103366 | LOC100046973  | "similar to [Human Ig rearranged gamma chain mRNA, V-J-C region and corr    | 2.176 |
| A_51_P480602  | NM_009363          | Tff2          | trefoil factor 2 (spasmolytic protein 1)                                    | 2.169 |
| A_55_P2092310 | AK195427           | NA            | NA                                                                          | 2.205 |
| A_51_P338262  | NM_011619          | Tnnt2         | "troponin T2, cardiac"                                                      | 2.228 |
| A_51_P233160  | NM_027309          | Lysmd2        | "LysM, putative peptidoglycan-binding, domain containing 2"                 | 2.157 |
| A_66_P139666  | NM_177013          | Tmem229a      | transmembrane protein 229A                                                  | 2.151 |
| A_55_P1991214 | NM_001113474       | Lair1         | leukocyte-associated Ig-like receptor 1                                     | 2.134 |
| A_52_P343306  | NM_010378          | H2-Aa         | "histocompatibility 2, class II antigen A, alpha"                           | 2.144 |
| A_51_P123625  | NM_008392          | Irg1          | immunoresponsive gene 1                                                     | 2.192 |
| A_52_P546162  | ENSMUST00000103355 | NA            | NA                                                                          | 2.098 |
| A_52_P366047  | NM_145938          | Rpp40         | ribonuclease P 40 subunit (human)                                           | 2.142 |
| A_55_P1974367 | NM_010174          | Fabp3         | "fatty acid binding protein 3, muscle and heart"                            | 2.114 |
| A_55_P1978994 | ENSMUST00000103472 | NA            | NA                                                                          | 2.147 |
| A_52_P476431  | NM_021292          | Evc           | Ellis van Creveld gene homolog (human)                                      | 2.092 |
| A_55_P1958480 | BC089308           | LOC545005     | hypothetical protein LOC545005                                              | 2.129 |
| A_55_P1994042 | NM_001139519       | Zbp1          | Z-DNA binding protein 1                                                     | 2.108 |
| A_55_P2023912 | NA                 | NA            | NA                                                                          | 2.241 |
| A_55_P1980601 | NM_172701          | Oscp1         | organic solute carrier partner 1                                            | 2.104 |
| A_55_P1954116 | NM_133882          | C8b           | "complement component 8, beta polypeptide"                                  | 2.107 |
| A_51_P326191  | NM_009251          | Serpina3g     | "serine (or cysteine) peptidase inhibitor, clade A, member 3G"              | 2.103 |
| A_52_P299771  | NM_007535          | Bcl2a1c       | B-cell leukemia/lymphoma 2 related protein A1c                              | 2.111 |
| A_55_P1986341 | NR_002858          | Gm4956        | predicted gene 4956                                                         | 2.093 |
| A_55_P2143041 | NM_016966          | Phgdh         | 3-phosphoglycerate dehydrogenase                                            | 2.048 |
| A_55_P2154933 | NM_207244          | Cd200r4       | CD200 receptor 4                                                            | 2.05  |
| A_55_P1997003 | BC031891           | Serpina4-ps1  | "serine (or cysteine) peptidase inhibitor, clade A, member 4, pseudogene 1" | 2.097 |
| A_55_P1973995 | ENSMUST00000077710 | NA            | NA                                                                          | 2.137 |
| A_51_P323180  | NM_172777          | Gbp9          | guanylate-binding protein 9                                                 | 2.129 |
| A_55_P2000595 | NA                 | NA            | NA                                                                          | 2.101 |
| A_51_P492830  | NM_021886          | Cenph         | centromere protein H                                                        | 2.073 |



Table S2. (continued)

|               |                    |              |                                                                             |       |
|---------------|--------------------|--------------|-----------------------------------------------------------------------------|-------|
| A_52_P244193  | NM_009846          | Cd24a        | CD24a antigen                                                               | 2.045 |
| A_55_P2124976 | NM_145890          | Grhl1        | grainyhead-like 1 (Drosophila)                                              | 2.051 |
| A_55_P1955305 | NM_001002898       | Sirpb1a      | signal-regulatory protein beta 1A                                           | 2.068 |
| A_51_P204740  | NM_133654          | Cd34         | CD34 antigen                                                                | 2.081 |
| A_55_P2040485 | XM_889011          | Ms4a4a       | "membrane-spanning 4-domains, subfamily A, member 4A"                       | 2.007 |
| A_51_P414879  | ENSMUST00000103304 | NA           | NA                                                                          | 2.192 |
| A_55_P2041444 | NM_001110784       | Xlr3a        | X-linked lymphocyte-regulated 3A                                            | 2.11  |
| A_55_P2178578 | NM_145403          | Tmprss4      | "transmembrane protease, serine 4"                                          | 2.043 |
| A_55_P1978424 | NM_007536          | Bcl2a1d      | B-cell leukemia/lymphoma 2 related protein A1d                              | 2.05  |
| A_51_P302358  | NM_008518          | Ltb          | lymphotoxin B                                                               | 2.079 |
| A_55_P2033041 | NM_001173460       | Sirpb1b      | signal-regulatory protein beta 1B                                           | 2.037 |
| A_55_P2266178 | BC028446           | AI790276     | expressed sequence AI790276                                                 | 2.024 |
| A_51_P360492  | NM_008567          | Mcm6         | "minichromosome maintenance deficient 6 (MIS5 homolog, S. pombe) (S. ce     | 2.032 |
| A_55_P1965101 | NM_001081643       | Xlr3b        | X-linked lymphocyte-regulated 3B                                            | 2.136 |
| A_52_P590154  | NM_013786          | Hsd17b6      | hydroxysteroid (17-beta) dehydrogenase 6                                    | 2.052 |
| A_52_P250644  | XM_001479095       | LOC100047902 | similar to RIKEN cDNA 1700022C21 gene                                       | 2.212 |
| A_55_P1964648 | NM_001037719       | Btla         | B and T lymphocyte associated                                               | 1.968 |
| A_55_P1962918 | NM_001033450       | Mnda         | myeloid cell nuclear differentiation antigen                                | 2.019 |
| A_51_P299149  | NM_145451          | Gpx6         | glutathione peroxidase 6                                                    | 2.016 |
| A_51_P394814  | NM_022814          | Svep1        | "sushi, von Willebrand factor type A, EGF and pentraxin domain containing 1 | 2.003 |
| A_55_P1985544 | NM_029911          | Kcnk10       | "potassium channel, subfamily K, member 10"                                 | 2.088 |
| A_52_P410685  | NM_033073          | Krt7         | keratin 7                                                                   | 2.111 |
| A_55_P2022211 | NM_026162          | Plxdc2       | plexin domain containing 2                                                  | 2.064 |
| A_51_P161021  | NM_008332          | Ifit2        | interferon-induced protein with tetratricopeptide repeats 2                 | 2.076 |
| A_52_P257625  | NM_023612          | Esm1         | endothelial cell-specific molecule 1                                        | 2.016 |
| A_51_P108459  | NM_008152          | Gpr65        | G-protein coupled receptor 65                                               | 2.032 |
| A_55_P2039541 | NM_153820          | Arhgap15     | Rho GTPase activating protein 15                                            | 2.007 |
| A_55_P2033780 | NM_010174          | Fabp3        | "fatty acid binding protein 3, muscle and heart"                            | 1.983 |
| A_51_P519251  | NM_019738          | Nupr1        | nuclear protein 1                                                           | 1.983 |
| A_52_P390127  | AK138801           | Klrc1        | "killer cell lectin-like receptor subfamily C, member 1"                    | 1.948 |
| A_51_P209818  | NM_011178          | Prtn3        | proteinase 3                                                                | 1.954 |
| A_55_P2114953 | NM_011909          | Usp18        | ubiquitin specific peptidase 18                                             | 1.982 |
| A_55_P1970105 | NM_013589          | Ltbp2        | latent transforming growth factor beta binding protein 2                    | 1.998 |

Table S3. 173 genes that were under-expressed in the liver of the Nrf2 knock-out mice compared to the wild-type mice after 180 days on high-fat diet.

| Probe ID      | Primary Accession | Gene Symbol   | Gene Name                                                                     | fold change |
|---------------|-------------------|---------------|-------------------------------------------------------------------------------|-------------|
| A_51_P411271  | NM_010902         | Nfe2l2        | "nuclear factor, erythroid derived 2, like 2"                                 | -1098       |
| A_52_P562267  | NM_001033819      | 9130409I23Rik | RIKEN cDNA 9130409I23 gene                                                    | -30.27      |
| A_55_P2032946 | NM_008181         | Gsta1         | "glutathione S-transferase, alpha 1 (Ya)"                                     | -21.27      |
| A_55_P2114342 | ENSMUST00000100   | NA            | NA                                                                            | -13.35      |
| A_55_P2017116 | XM_001480391      | LOC625953     | similar to Glutathione S-transferase Ya chain (GST class-alpha) (Ya1)         | -12.64      |
| A_51_P253481  | NM_021456         | Ces1          | carboxylesterase 1                                                            | -11.38      |
| A_52_P669922  | NM_032541         | Hamp          | hepcidin antimicrobial peptide                                                | -10.74      |
| A_55_P2130885 | NM_008552         | Mas1          | MAS1 oncogene                                                                 | -9.942      |
| A_55_P2102065 | NM_001122660      | Gm10639       | predicted gene 10639                                                          | -9.891      |
| A_52_P289091  | NM_007813         | Cyp2b13       | "cytochrome P450, family 2, subfamily b, polypeptide 13"                      | -9.87       |
| A_66_P104980  | NM_177919         | Tceal5        | transcription elongation factor A (SII)-like 5                                | -9.749      |
| A_55_P2126850 | NM_021431         | Nudt11        | nudix (nucleoside diphosphate linked moiety X)-type motif 11                  | -9.572      |
| A_55_P2164075 | XM_001479672      | LOC100048172  | hypothetical protein LOC100048172                                             | -9.388      |
| A_51_P346893  | NM_019578         | Extl1         | exostoses (multiple)-like 1                                                   | -8.162      |
| A_51_P206235  | NM_028051         | Slc39a5       | "solute carrier family 39 (metal ion transporter), member 5"                  | -7.851      |
| A_55_P2034517 | ENSMUST00000156   | NA            | NA                                                                            | -7.58       |
| A_51_P326685  | NM_176920         | Lrtm1         | leucine-rich repeats and transmembrane domains 1                              | -7.062      |
| A_55_P2387915 | AK143789          | Gm10804       | predicted gene 10804                                                          | -6.867      |
| A_55_P2154377 | XM_911133         | Gm7169        | predicted gene 7169                                                           | -5.979      |
| A_51_P446512  | ENSMUST00000094   | 2310016G11Rik | RIKEN cDNA 2310016G11 gene                                                    | -5.608      |
| A_55_P2047809 | NM_175692         | Snhg11        | small nucleolar RNA host gene 11 (non-protein coding)                         | -5.605      |
| A_51_P267933  | NM_175692         | Snhg11        | small nucleolar RNA host gene 11 (non-protein coding)                         | -5.479      |
| A_55_P1975989 | NM_172864         | Wdr63         | WD repeat domain 63                                                           | -5.224      |
| A_55_P1966432 | NM_010358         | Gstm1         | "glutathione S-transferase, mu 1"                                             | -5.138      |
| A_55_P2198983 | AI606402          | 4930415C11Rik | RIKEN cDNA 4930415C11 gene                                                    | -5.036      |
| A_51_P424338  | NM_008706         | Nqo1          | "NAD(P)H dehydrogenase, quinone 1"                                            | -4.925      |
| A_51_P386648  | NM_027227         | Glod5         | glyoxalase domain containing 5                                                | -4.812      |
| A_55_P2093704 | NM_008579         | Meig1         | meiosis expressed gene 1                                                      | -4.718      |
| A_55_P2062190 | NM_010358         | Gstm1         | "glutathione S-transferase, mu 1"                                             | -4.709      |
| A_55_P2160128 | NM_001033210      | Pls1          | plastin 1 (I-isoform)                                                         | -4.574      |
| A_51_P514319  | NM_172892         | Slc13a4       | "solute carrier family 13 (sodium/sulfate symporters), member 4"              | -4.408      |
| A_51_P199168  | NM_007702         | Cidea         | "cell death-inducing DNA fragmentation factor, alpha subunit-like effector A" | -4.372      |
| A_55_P1985623 | NM_029600         | Abcc3         | "ATP-binding cassette, sub-family C (CFTR/MRP), member 3"                     | -4.36       |
| A_55_P2171413 | NM_008615         | Me1           | "malic enzyme 1, NADP(+)-dependent, cytosolic"                                | -4.322      |
| A_55_P2029111 | XM_001479090      | LOC100048011  | hypothetical protein LOC100048011                                             | -4.313      |

Table S3. (continued)

|               |               |               |                                                                                   |        |
|---------------|---------------|---------------|-----------------------------------------------------------------------------------|--------|
| A_55_P2172396 | NM_178796     | A530064D06Rik | RIKEN cDNA A530064D06 gene                                                        | -4.294 |
| A_66_P124420  | NAP001637-001 | NA            | NA                                                                                | -4.262 |
| A_51_P471458  | NM_020564     | Sult5a1       | "sulfotransferase family 5A, member 1"                                            | -4.209 |
| A_55_P2016842 | NM_008615     | Me1           | "malic enzyme 1, NADP(+)-dependent, cytosolic"                                    | -4.141 |
| A_51_P343350  | NM_033603     | Amn           | amnionless                                                                        | -4.039 |
| A_55_P2268221 | NM_030113     | Arhgap10      | Rho GTPase activating protein 10                                                  | -4.018 |
| A_55_P2065231 | NM_010359     | Gstm3         | "glutathione S-transferase, mu 3"                                                 | -4.016 |
| A_55_P1985346 | XM_001475143  | Gm13017       | predicted gene 13017                                                              | -3.998 |
| A_55_P2124712 | NM_145603     | Ces2          | carboxylesterase 2                                                                | -3.868 |
| A_65_P02177   | NM_026764     | Gstm4         | "glutathione S-transferase, mu 4"                                                 | -3.86  |
| A_55_P1992986 | XM_979688     | LOC675135     | "similar to amyotrophic lateral sclerosis 2 (juvenile) chromosome region, candida | -3.822 |
| A_51_P333111  | NM_009676     | Aox1          | aldehyde oxidase 1                                                                | -3.785 |
| A_52_P318361  | NM_145603     | Ces2          | carboxylesterase 2                                                                | -3.742 |
| A_55_P2170454 | NM_008182     | Gsta2         | "glutathione S-transferase, alpha 2 (Yc2)"                                        | -3.666 |
| A_55_P2150876 | NM_175370     | Als2cr12      | "amyotrophic lateral sclerosis 2 (juvenile) chromosome region, candidate 12 (hun  | -3.614 |
| A_52_P627269  | NM_198171     | BC015286      | cDNA sequence BC015286                                                            | -3.568 |
| A_55_P2408588 | NM_007489     | Arntl         | aryl hydrocarbon receptor nuclear translocator-like                               | -3.552 |
| A_55_P2148171 | NM_001168500  | A330049M08Rik | RIKEN cDNA A330049M08 gene                                                        | -3.512 |
| A_51_P397934  | NM_130455     | Grin3b        | "glutamate receptor, ionotropic, NMDA3B"                                          | -3.503 |
| A_55_P2135153 | NM_153558     | Lcn13         | lipocalin 13                                                                      | -3.492 |
| A_55_P2093705 | NM_008579     | Meig1         | meiosis expressed gene 1                                                          | -3.482 |
| A_55_P2095039 | NM_001168500  | A330049M08Rik | RIKEN cDNA A330049M08 gene                                                        | -3.476 |
| A_55_P2129449 | NM_020565     | Sult3a1       | "sulfotransferase family 3A, member 1"                                            | -3.465 |
| A_52_P578634  | NM_033612     | Cela1         | "chymotrypsin-like elastase family, member 1"                                     | -3.44  |
| A_51_P311958  | NM_013623     | Orm3          | orosomuroid 3                                                                     | -3.388 |
| A_52_P920158  | NM_001081425  | Rbm24         | RNA binding motif protein 24                                                      | -3.359 |
| A_55_P2004452 | NM_025703     | Tceal8        | transcription elongation factor A (SII)-like 8                                    | -3.337 |
| A_52_P602847  | NM_008134     | Glycam1       | glycosylation dependent cell adhesion molecule 1                                  | -3.296 |
| A_55_P2204491 | AI131754      | AI131754      | expressed sequence AI131754                                                       | -3.263 |
| A_55_P2124233 | NM_177723     | Vsig8         | V-set and immunoglobulin domain containing 8                                      | -3.263 |
| A_55_P2102060 | NM_010359     | Gstm3         | "glutathione S-transferase, mu 3"                                                 | -3.167 |
| A_55_P2069969 | NM_001122660  | Gm10639       | predicted gene 10639                                                              | -3.166 |
| A_55_P1972448 | XM_001472595  | Gm7300        | predicted gene 7300                                                               | -3.117 |
| A_55_P2100155 | NM_001038609  | Mapt          | microtubule-associated protein tau                                                | -3.114 |
| A_55_P1967350 | NM_172881     | Ugt2b35       | "UDP glucuronosyltransferase 2 family, polypeptide B35"                           | -3.074 |
| A_55_P1994112 | NM_013661     | Sema5b        | "sema domain, seven thrombospondin repeats (type 1 and type 1-like), transmen     | -3.016 |

Table S3. (continued)

|               |                  |              |                                                                                                              |        |
|---------------|------------------|--------------|--------------------------------------------------------------------------------------------------------------|--------|
| A_52_P9703    | NM_009997        | Cyp2a4       | "cytochrome P450, family 2, subfamily a, polypeptide 4"                                                      | -3     |
| A_55_P2007381 | ENSMUST000000321 | NA           | NA                                                                                                           | -2.932 |
| A_55_P1973844 | NM_013661        | Sema5b       | "sema domain, seven thrombospondin repeats (type 1 and type 1-like), transmembrane protein 5b"               | -2.916 |
| A_55_P1997585 | XM_286199        | Cyp2a21-ps   | "cytochrome P450, family 2, subfamily a, polypeptide 21, pseudogene"                                         | -2.904 |
| A_55_P2052824 | NM_001033042     | Lrrc14b      | leucine rich repeat containing 14B                                                                           | -2.89  |
| A_51_P327585  | NM_026764        | Gstm4        | "glutathione S-transferase, mu 4"                                                                            | -2.885 |
| A_55_P2100149 | NM_001038609     | Mapt         | microtubule-associated protein tau                                                                           | -2.873 |
| A_66_P136778  | NM_177922        | Mapk15       | mitogen-activated protein kinase 15                                                                          | -2.873 |
| A_55_P1953341 | NM_026323        | Wfdc2        | WAP four-disulfide core domain 2                                                                             | -2.852 |
| A_55_P1976744 | XM_001478262     | Gm4324       | predicted gene 4324                                                                                          | -2.851 |
| A_55_P2051596 | XM_001479558     | Gm4499       | predicted gene 4499                                                                                          | -2.846 |
| A_51_P163578  | NM_172881        | Ugt2b35      | "UDP glucuronosyltransferase 2 family, polypeptide B35"                                                      | -2.843 |
| A_55_P1960828 | NM_172371        | Slc16a13     | "solute carrier family 16 (monocarboxylic acid transporters), member 13"                                     | -2.84  |
| A_55_P2003053 | NM_010024        | Dct          | dopachrome tautomerase                                                                                       | -2.805 |
| A_55_P2007326 | NM_009997        | Cyp2a4       | "cytochrome P450, family 2, subfamily a, polypeptide 4"                                                      | -2.783 |
| A_55_P1961466 | NM_010024        | Dct          | dopachrome tautomerase                                                                                       | -2.773 |
| A_55_P1954486 | NM_001038609     | Mapt         | microtubule-associated protein tau                                                                           | -2.764 |
| A_55_P2126940 | XM_001474703     | Gm7262       | predicted gene 7262                                                                                          | -2.759 |
| A_55_P2051796 | NM_001024841     | Gm128        | predicted gene 128                                                                                           | -2.755 |
| A_55_P2049771 | XM_001480935     | Gm4621       | predicted gene 4621                                                                                          | -2.742 |
| A_55_P2185178 | ENSMUST000000096 | Tmem28       | transmembrane protein 28                                                                                     | -2.736 |
| A_55_P1957918 | NM_001135192     | Asap2        | "ArfGAP with SH3 domain, ankyrin repeat and PH domain 2"                                                     | -2.725 |
| A_55_P2071906 | ENSMUST00000108  | NA           | NA                                                                                                           | -2.699 |
| A_51_P276943  | NM_016696        | Gpc1         | glypican 1                                                                                                   | -2.69  |
| A_51_P392967  | NM_053253        | Zmynd10      | "zinc finger, MYND domain containing 10"                                                                     | -2.69  |
| A_55_P1995135 | NM_027195        | Casz1        | "castor homolog 1, zinc finger (Drosophila)"                                                                 | -2.686 |
| A_51_P481159  | NM_173047        | Cbr3         | carbonyl reductase 3                                                                                         | -2.684 |
| A_51_P156955  | NM_013459        | Cfd          | complement factor D (adipsin)                                                                                | -2.663 |
| A_52_P278581  | BC029005         | Zbtb1        | zinc finger and BTB domain containing 1                                                                      | -2.655 |
| A_51_P387400  | NM_026535        | Serpina12    | "serine (or cysteine) peptidase inhibitor, clade A (alpha-1 antiproteinase, antitrypsin inhibitor, alpha-1)" | -2.642 |
| A_51_P362066  | NM_007695        | Chi3l1       | chitinase 3-like 1                                                                                           | -2.636 |
| A_55_P1954842 | XM_001477923     | LOC100047186 | hypothetical protein LOC100047186                                                                            | -2.629 |
| A_55_P2016166 | NM_026323        | Wfdc2        | WAP four-disulfide core domain 2                                                                             | -2.614 |
| A_55_P2044653 | NM_009999        | Cyp2b10      | "cytochrome P450, family 2, subfamily b, polypeptide 10"                                                     | -2.565 |
| A_55_P1998811 | XM_001476688     | Gm3430       | predicted gene 3430                                                                                          | -2.557 |
| A_55_P2022128 | NM_016782        | Cntnap1      | contactin associated protein-like 1                                                                          | -2.551 |

Table S3. (continued)

|               |                 |               |                                                                                  |        |
|---------------|-----------------|---------------|----------------------------------------------------------------------------------|--------|
| A_51_P104718  | NM_001010941    | Gpr12         | G-protein coupled receptor 12                                                    | -2.539 |
| A_55_P1972436 | NM_178666       | Themis        | thymocyte selection associated                                                   | -2.523 |
| A_55_P1997651 | NM_207687       | Espn          | espin                                                                            | -2.514 |
| A_55_P1998656 | NM_001026214    | Entpd5        | ectonucleoside triphosphate diphosphohydrolase 5                                 | -2.482 |
| A_55_P2058189 | NM_029875       | Slc35e3       | "solute carrier family 35, member E3"                                            | -2.482 |
| A_55_P2090060 | NM_172295       | BC037703      | cDNA sequence BC037703                                                           | -2.474 |
| A_51_P358256  | NM_009803       | Nr1i3         | "nuclear receptor subfamily 1, group I, member 3"                                | -2.465 |
| A_51_P178772  | NM_144930       | AU018778      | expressed sequence AU018778                                                      | -2.453 |
| A_51_P324633  | NM_007703       | Elov3         | "elongation of very long chain fatty acids (FEN1/Elo2, SUR4/Elo3, yeast)-like 3" | -2.427 |
| A_55_P2006008 | NM_025429       | Serpinb1a     | "serine (or cysteine) peptidase inhibitor, clade B, member 1a"                   | -2.422 |
| A_55_P2101776 | NM_001008533    | Adora1        | adenosine A1 receptor                                                            | -2.42  |
| A_55_P2391534 | AK015487        | 4930459C07Rik | RIKEN cDNA 4930459C07 gene                                                       | -2.407 |
| A_51_P164630  | NM_026808       | Fitm1         | fat storage-inducing transmembrane protein 1                                     | -2.406 |
| A_55_P2002578 | NM_010145       | Ephx1         | "epoxide hydrolase 1, microsomal"                                                | -2.394 |
| A_55_P1998651 | NM_001026214    | Entpd5        | ectonucleoside triphosphate diphosphohydrolase 5                                 | -2.39  |
| A_55_P1962766 | NM_001085513    | Fam131c       | "family with sequence similarity 131, member C"                                  | -2.374 |
| A_55_P1985351 | NM_028060       | Slc35f2       | "solute carrier family 35, member F2"                                            | -2.374 |
| A_51_P501844  | NM_175475       | Cyp26b1       | "cytochrome P450, family 26, subfamily b, polypeptide 1"                         | -2.37  |
| A_51_P324351  | NM_013900       | Mfi2          | antigen p97 (melanoma associated) identified by monoclonal antibodies 133.2 ar   | -2.365 |
| A_52_P327156  | NR_027970       | 0610008F07Rik | RIKEN cDNA 0610008F07 gene                                                       | -2.336 |
| A_55_P2035824 | NM_009803       | Nr1i3         | "nuclear receptor subfamily 1, group I, member 3"                                | -2.306 |
| A_55_P2006236 | NM_009466       | Ugdh          | UDP-glucose dehydrogenase                                                        | -2.296 |
| A_55_P1975080 | NM_009467       | Ugt2b5        | "UDP glucuronosyltransferase 2 family, polypeptide B5"                           | -2.283 |
| A_51_P377856  | NM_133994       | Gstt3         | "glutathione S-transferase, theta 3"                                             | -2.24  |
| A_51_P401184  | NM_001164763    | Rarres1       | retinoic acid receptor responder (tazarotene induced) 1                          | -2.232 |
| A_55_P2061338 | NM_153081       | Slc16a11      | "solute carrier family 16 (monocarboxylic acid transporters), member 11"         | -2.223 |
| A_55_P2002577 | NM_010145       | Ephx1         | "epoxide hydrolase 1, microsomal"                                                | -2.22  |
| A_55_P2318584 | NM_007474       | Aqp8          | aquaporin 8                                                                      | -2.217 |
| A_52_P256914  | NM_010000       | Cyp2b9        | "cytochrome P450, family 2, subfamily b, polypeptide 9"                          | -2.215 |
| A_51_P495269  | NM_008508       | Lor           | loricrin                                                                         | -2.21  |
| A_51_P302856  | NM_053215       | Ugt2b37       | "UDP glucuronosyltransferase 2 family, polypeptide B37"                          | -2.197 |
| A_55_P2157620 | ENSMUST00000099 | NA            | NA                                                                               | -2.194 |
| A_66_P106611  | NM_008137       | Gna14         | "guanine nucleotide binding protein, alpha 14"                                   | -2.184 |
| A_52_P883557  | NM_001033286    | Slc30a10      | "solute carrier family 30, member 10"                                            | -2.176 |
| A_52_P469502  | NM_028176       | Cda           | cytidine deaminase                                                               | -2.172 |
| A_55_P1991416 | XM_001473368    | NA            | NA                                                                               | -2.171 |

Table S3. (continued)

|               |              |          |                                                                                   |        |
|---------------|--------------|----------|-----------------------------------------------------------------------------------|--------|
| A_51_P246677  | NM_020002    | Rec8     | REC8 homolog (yeast)                                                              | -2.168 |
| A_51_P365019  | NM_010295    | Gclc     | "glutamate-cysteine ligase, catalytic subunit"                                    | -2.165 |
| A_55_P2078955 | NM_007474    | Aqp8     | aquaporin 8                                                                       | -2.156 |
| A_52_P661587  | NM_001025576 | Ccdc141  | coiled-coil domain containing 141                                                 | -2.151 |
| A_52_P315976  | NM_009416    | Tpm2     | "tropomyosin 2, beta"                                                             | -2.15  |
| A_55_P2143219 | NM_011242    | Rasgrp2  | "RAS, guanyl releasing protein 2"                                                 | -2.144 |
| A_51_P372550  | NM_026770    | Cgref1   | cell growth regulator with EF hand domain 1                                       | -2.138 |
| A_52_P536494  | NM_008709    | Mycn     | "v-myc myelocytomatosis viral related oncogene, neuroblastoma derived (avian)"    | -2.134 |
| A_55_P2042156 | NM_007377    | Aatk     | apoptosis-associated tyrosine kinase                                              | -2.102 |
| A_55_P2021572 | NM_001164284 | C87414   | expressed sequence C87414                                                         | -2.09  |
| A_55_P2010906 | NM_153405    | Rbm45    | RNA binding motif protein 45                                                      | -2.087 |
| A_55_P2029203 | NM_026700    | Dopey2   | dopey family member 2                                                             | -2.084 |
| A_51_P315682  | NM_183029    | Igf2bp2  | insulin-like growth factor 2 mRNA binding protein 2                               | -2.08  |
| A_51_P200083  | NM_023168    | Grina    | "glutamate receptor, ionotropic, N-methyl D-aspartate-associated protein 1 (gluta | -2.078 |
| A_52_P21486   | NM_183257    | Hamp2    | hepcidin antimicrobial peptide 2                                                  | -2.077 |
| A_55_P2096043 | NM_025590    | Acot11   | acyl-CoA thioesterase 11                                                          | -2.076 |
| A_51_P498882  | NM_010001    | Cyp2c37  | "cytochrome P450, family 2. subfamily c, polypeptide 37"                          | -2.071 |
| A_51_P404193  | NM_022435    | Sp5      | trans-acting transcription factor 5                                               | -2.065 |
| A_51_P369784  | NM_133660    | Es22     | esterase 22                                                                       | -2.064 |
| A_55_P2105858 | NM_030693    | Atf5     | activating transcription factor 5                                                 | -2.053 |
| A_55_P2143233 | NM_011242    | Rasgrp2  | "RAS, guanyl releasing protein 2"                                                 | -2.051 |
| A_51_P372141  | NM_001039509 | Pnkd     | paroxysmal nonkinesiogenic dyskinesia                                             | -2.05  |
| A_55_P1994132 | AK148454     | Tmem184a | transmembrane protein 184a                                                        | -2.032 |
| A_52_P413947  | NM_010840    | Mthfr    | "5,10-methylenetetrahydrofolate reductase"                                        | -2.02  |
| A_55_P2180744 | NM_153508    | Clstn3   | calsyntenin 3                                                                     | -2.008 |
| A_55_P2173817 | NM_008552    | Mas1     | MAS1 oncogene                                                                     | -2.008 |
| A_55_P1960291 | NM_013769    | Tjp3     | tight junction protein 3                                                          | -2.006 |
| A_55_P2033272 | NM_021481    | Treh     | trehalase (brush-border membrane glycoprotein)                                    | -2.005 |
| A_52_P142520  | NM_198292    | Tex2     | testis expressed gene 2                                                           | -1.989 |
| A_52_P456561  | NM_007435    | Abcd1    | "ATP-binding cassette, sub-family D (ALD), member 1"                              | -1.958 |
